# Supplementary material
Source: PubMed Central journal article supplement (PMC4465378)
Supplement: NIHMS639048-supplement-Supplemental_Material_File__1.pdf [file NIHMS639048-supplement-Supplemental_Material_File__1.pdf]

**Supplementary Table I: Checklist of Study-Wide Elements Essential to Describe when Reporting or Sharing Data in Studies of Stroke Genetics**

| <b>Data Element</b>          | <b>Description</b>                                                                                                                                                                                                                                                                                                                                                                                                                                                                                                                                                                 |
|------------------------------|------------------------------------------------------------------------------------------------------------------------------------------------------------------------------------------------------------------------------------------------------------------------------------------------------------------------------------------------------------------------------------------------------------------------------------------------------------------------------------------------------------------------------------------------------------------------------------|
| <b>Study design</b>          | Fully describe overall study design (e.g. case-control; cohort; imbedded)<br>How were cases and controls identified and recruited?                                                                                                                                                                                                                                                                                                                                                                                                                                                 |
| <b>Study population</b>      | Describe geographic area, recruitment location and method of cases and controls                                                                                                                                                                                                                                                                                                                                                                                                                                                                                                    |
| <b>Case definition</b>       | Provide definitions of IS/ICH/SAH (both clinical and radiographic components)<br>Describe who adjudicated cases, with what data, and by what process                                                                                                                                                                                                                                                                                                                                                                                                                               |
| <b>Control definition</b>    | Define stroke-free status<br>Describe matching of controls to cases on sex, age, race/ethnicity. It is also preferable to match on geography and time period.<br>Describe who adjudicated the controls, with what data, and by what process.                                                                                                                                                                                                                                                                                                                                       |
| <b>Consent form elements</b> | Provide a copy of the study consent form.<br>Additionally, describe:<br>-allowances for data sharing with collaborators (including limitations by facility or country) and into data repositories.<br>-whether investigators offered to return main or incidental findings to patients, and if so, using what process?<br>-whether the genetic sample or data is allowed to be used in future studies and if so, for what purposes?<br>If any of the above items are patient-level options in the consent form, provide the specific responses in the case report form by subject. |
| <b>Sample Transfers</b>      | See companion paper <sup>1</sup> for discussion of Material Transfer Agreements between facilities when sharing samples.                                                                                                                                                                                                                                                                                                                                                                                                                                                           |
| <b>Risk factors</b>          | Provide definitions of all risk factors, using standardized definitions<br>Individualize risk factors collected if necessary for unique populations (e.g. pediatrics)<br>Record as quantitative variables wherever feasible and possible                                                                                                                                                                                                                                                                                                                                           |
| <b>Neuroimaging</b>          | Provide information on all MR parameters, including diffusion gradients and fractional anisotropy<br>Provide imaging data for centralized adjudication                                                                                                                                                                                                                                                                                                                                                                                                                             |
| <b>Data Timepoints</b>       | Provide recruitment dates, inclusive, for both cases and controls<br>Provide the timepoints relevant to the index stroke (for cases) or enrollment (for controls) that outcomes data is measured in the study overall<br>-Recommended early timepoints: 24 hours, 7 days or at discharge (whichever is earlier)<br>-Recommended late timepoints: 3 mo preferred; 6 and 12 months are also options                                                                                                                                                                                  |

Acronyms: ICH: intracerebral hemorrhage; IS: ischemic stroke; MR: magnetic resonance; SAH: subarachnoid hemorrhage

<sup>1</sup> Battey TWK, Valant V, Kassis SB, Kourkoulis C, Lee C, Anderson CD, et al. Recommendations from the International Stroke Genetics Consortium, part 2: Biological sample collection and storage. *Accepted to Stroke*. 2014

**Supplementary Table II: Checklist of Minimal and Preferred Patient-Level Data Elements to Collect in Studies of Stroke Genetics**

| <b>Data Type</b>             | <b>Data Element</b>                                    | <b>Definitions or Comments</b>                                                                            | <b>Minimal</b> | <b>Preferred</b> |
|------------------------------|--------------------------------------------------------|-----------------------------------------------------------------------------------------------------------|----------------|------------------|
| <b>Consent Form Elements</b> | Data sharing                                           | Are there limits on sharing with certain types of investigators? Is sharing with other countries allowed? | X              |                  |
|                              | Future uses                                            | Which patients allow their data to be used in future studies and what uses are allowed?                   | X              |                  |
|                              | Return of information                                  | Which patients prefer to have main or incidental findings returned to them?                               | X              |                  |
|                              | Person providing consent                               | Specify if case, LAR, or other method                                                                     |                | X                |
| <b>Subject Demographics</b>  | Case or control status                                 |                                                                                                           | X              |                  |
|                              | Year of birth                                          |                                                                                                           | X              |                  |
|                              | Sex                                                    | Male / female                                                                                             | X              |                  |
|                              | Race/ethnicity                                         | Self-reported; categories will depend on population sample; provide definitions of categories             |                | X                |
|                              | Height, weight                                         |                                                                                                           |                | X                |
|                              | Date of biosample draw                                 |                                                                                                           | X              |                  |
|                              | Age at or date of assessment of case vs control status |                                                                                                           |                | X                |
|                              | Age at or date of incident stroke                      | If case                                                                                                   | X              |                  |
|                              | Age at or date of prior stroke(s)                      | If case; specify for each whether IS, ICH, SAH                                                            |                | X                |

|                              |                                                                 |                                                                                                                                                                                                           |  |   |
|------------------------------|-----------------------------------------------------------------|-----------------------------------------------------------------------------------------------------------------------------------------------------------------------------------------------------------|--|---|
|                              | Age at or date of recurrent stroke(s) or other follow-up events | Specify for each whether IS, ICH, SAH                                                                                                                                                                     |  | X |
|                              | Last follow-up date                                             | For cases and controls                                                                                                                                                                                    |  | X |
| <b>Vascular Risk factors</b> | Hypertension                                                    | Confirmed by the patient or medical record                                                                                                                                                                |  |   |
|                              | Diabetes mellitus                                               | Confirmed by the patient or medical record                                                                                                                                                                |  | X |
|                              | Atrial fibrillation / flutter                                   | Confirmed by the patient or medical record                                                                                                                                                                |  | X |
|                              | Dyslipidemia                                                    | Confirmed by the patient or medical record                                                                                                                                                                |  | X |
|                              | Family history of stroke                                        | In 1st degree relative; specify IS, SAH, or ICH; specify if early stroke (<55 years old)                                                                                                                  |  | X |
|                              | Coronary artery disease                                         | Confirmed by the patient or medical record                                                                                                                                                                |  | X |
|                              | Peripheral artery disease                                       | Confirmed by the patient or medical record                                                                                                                                                                |  | X |
|                              | Obesity                                                         | Body mass index                                                                                                                                                                                           |  | X |
|                              | Cardiac valvular disease                                        | Specify valve                                                                                                                                                                                             |  | X |
|                              | Carotid artery stenosis                                         | Record percent stenosis, imaging method (e.g. angiography, Doppler ultrasound) and method of determination (e.g. European Carotid Surgery Trial, North American Symptomatic Carotid Endarterectomy Trial) |  | X |
|                              | Pregnancy                                                       | Not applicable / not pregnant; pregnant (note trimester or week of pregnancy); 0-12 weeks post-partum                                                                                                     |  | X |
|                              | History of IA                                                   | For cases of aSAH and IA studies, record:                                                                                                                                                                 |  | X |

|                                                                            |                    |                                                                                                                                                                                                                                                                                                                                                                                                    |   |   |
|----------------------------------------------------------------------------|--------------------|----------------------------------------------------------------------------------------------------------------------------------------------------------------------------------------------------------------------------------------------------------------------------------------------------------------------------------------------------------------------------------------------------|---|---|
|                                                                            |                    | Personal and family history of IA/SAH and aneurysms in other vascular beds;<br>IA location and both ruptured and unruptured IA status<br>Presence of IA-associated syndromic conditions                                                                                                                                                                                                            |   |   |
|                                                                            | Tobacco            | Record mode of use (e.g. cigarettes, cigars, pipes) and classify as current ( $\geq 1$ cigarettes / day within 90 days), former ( $\geq 1$ cigarettes / day for at least 90 days but none in last 90d), or never<br>Investigators can also record usage as number of packs per year and specify date of last use<br>Smokeless tobacco requires separate definitions in populations with high usage |   | X |
|                                                                            | Alcohol            | Specify as current vs. past use (specify date of last use); daily (number of drinks per day) vs. binge use (over 5 drinks per occasion); quantify amount per day of drinking; use standard volumes for units                                                                                                                                                                                       |   | X |
|                                                                            | Recreational drugs | Specify type and frequency                                                                                                                                                                                                                                                                                                                                                                         |   | X |
| <b>Stroke Phenotype</b>                                                    | IS Subtype         | TOAST                                                                                                                                                                                                                                                                                                                                                                                              | X |   |
|                                                                            |                    | Causative Classification System / ASCO Phenotypic System                                                                                                                                                                                                                                                                                                                                           |   | X |
|                                                                            | IS Severity        | NIHSS or SSS                                                                                                                                                                                                                                                                                                                                                                                       |   | X |
|                                                                            | ICH Location       | Deep (originating from the deep gray structures - thalamus, basal ganglia, internal capsule, periventricular)                                                                                                                                                                                                                                                                                      | X |   |
|                                                                            |                    | Lobar (cortical and/or immediately subcortical white matter distinct from the deep structures cited under deep ICH)                                                                                                                                                                                                                                                                                | X |   |
|                                                                            |                    | Brainstem                                                                                                                                                                                                                                                                                                                                                                                          | X |   |
|                                                                            |                    | Cerebellum                                                                                                                                                                                                                                                                                                                                                                                         | X |   |
| Primary IVH (hemorrhage originating from and mainly limited to ventricles) |                    | X                                                                                                                                                                                                                                                                                                                                                                                                  |   |   |
| Single (where deep vs. lobar localization cannot be distinguished)         | X                  |                                                                                                                                                                                                                                                                                                                                                                                                    |   |   |

|                                                                                    |                          |                                                                      |   |   |
|------------------------------------------------------------------------------------|--------------------------|----------------------------------------------------------------------|---|---|
|                                                                                    |                          | Multiple (multiple, distinct ICH's in both deep and lobar locations) | X |   |
|                                                                                    | ICH Severity             | GCS                                                                  | X |   |
|                                                                                    |                          | FUNC or ICH score                                                    |   | X |
|                                                                                    | ICH Size                 | <30cc, 30-60cc, or >60cc                                             | X |   |
|                                                                                    |                          | Cubic centimeter (ABC/2 method)                                      |   | X |
|                                                                                    | SAH Subtype              | Aneurysmal (berry or fusiform)                                       | X |   |
|                                                                                    |                          | Intracranial dissection                                              |   |   |
|                                                                                    |                          | Perimesencephalic with IA                                            |   |   |
|                                                                                    |                          | Cortical without structural cause                                    |   |   |
|                                                                                    | SAH Severity             | Hunt and Hess or WFNS                                                | X |   |
|                                                                                    |                          | Hemorrhage volume: Fisher or Hijdra scales                           |   | X |
|                                                                                    | IA Description           | Aneurysmal rupture status (ruptured / unruptured)                    | X |   |
|                                                                                    |                          | Multiplicity (solitary / multiple)                                   |   | X |
|                                                                                    |                          | Posterior / anterior or specific artery                              |   | X |
|                                                                                    |                          | Minimum diameter of largest aneurysm                                 |   | X |
| IA treatment modality, delayed cerebral ischemia, re-bleeding, neurologic outcomes |                          |                                                                      | X |   |
| <b>Outcomes Measures</b>                                                           | Mortality                | Date of death                                                        | X |   |
|                                                                                    |                          | Cause of death                                                       |   | X |
|                                                                                    | Neurologic deterioration | In-hospital, measured by NIHSS                                       |   | X |
|                                                                                    | Recurrent stroke         | Record date and stroke subtype                                       |   | X |
|                                                                                    | modified Rankin Score    | At all timepoints chosen                                             | X |   |

|                                                                                                                                                                                                                                                                                                                                                                                                                         |                                      |                                                                                                                                                   |  |   |
|-------------------------------------------------------------------------------------------------------------------------------------------------------------------------------------------------------------------------------------------------------------------------------------------------------------------------------------------------------------------------------------------------------------------------|--------------------------------------|---------------------------------------------------------------------------------------------------------------------------------------------------|--|---|
|                                                                                                                                                                                                                                                                                                                                                                                                                         | Barthel Index                        |                                                                                                                                                   |  | X |
|                                                                                                                                                                                                                                                                                                                                                                                                                         | Glasgow Outcome Scale                |                                                                                                                                                   |  | X |
|                                                                                                                                                                                                                                                                                                                                                                                                                         | Functional Independence Measurements |                                                                                                                                                   |  | X |
|                                                                                                                                                                                                                                                                                                                                                                                                                         | Hemorrhagic Transformation of IS     | Classify by subtype: hemorrhagic infarction without space-occupying effect (HI-1 or HI-2) or parenchymal hematoma with mass effect (PH-1 or PH-2) |  | X |
| <p>Acronyms: BMI: body mass index; IA: intracranial aneurysm; ICH: intracerebral hemorrhage; IS: ischemic stroke; IVH: intraventricular hemorrhage; LAR: legally authorized representative; NIHSS: National Institutes of Health Stroke Scale; SAH: subarachnoid hemorrhage; SSS: Scandinavian Stroke Scale; TOAST: Trial of ORG 10172 in Acute Stroke Treatment; WFNS: World Federation of Neurosurgical Societies</p> |                                      |                                                                                                                                                   |  |   |

**Supplementary Table III: Imaging Recommendations in Studies of Stroke Genetics**

|                                                                  | <b>Minimal</b>                               | <b>Preferred</b>         |
|------------------------------------------------------------------|----------------------------------------------|--------------------------|
| <b>Acute IS</b>                                                  | CT                                           | MRI: T2, FLAIR, DWI, ADC |
| <b>Chronic IS</b>                                                | CT                                           | MRI: T2, FLAIR, DWI      |
| <b>Lacune of presumed vascular origin</b>                        | CT                                           | MRI: T1, T2, FLAIR       |
| <b>Perivascular spaces</b>                                       | MRI: T2, FLAIR                               |                          |
| <b>White matter hyperintensities of presumed vascular origin</b> | CT                                           | MRI: T2, FLAIR           |
| <b>Spontaneous ICH</b>                                           | CT                                           | MRI T1, T2* (GRE or SWI) |
| <b>Spontaneous SAH</b>                                           | CT                                           | MRI T1, T2* (GRE or SWI) |
| <b>Hemorrhagic transformation of IS</b>                          | CT                                           | MRI: T2* (GRE or SWI)    |
| <b>Cerebral microbleeds, petechial hemorrhage</b>                | MRI: T2* (GRE or SWI)                        |                          |
| <b>Vascular malformations and aneurysms</b>                      | CTA, MRA, or digital subtraction angiography |                          |

**Acronyms:** CT: computed tomography; CTA: CT angiography; FLAIR: fluid attenuated inversion recovery; GRE – gradient echo; ICH: intracerebral hemorrhage; IS: ischemic stroke; MRA: MR angiography; SAH: subarachnoid hemorrhage; SWI – susceptibility weighted imaging; WMH: white matter hyperintensities
